# Supplementary material
Source: PubMed Central journal article supplement (PMC1754293)
Supplement: annrheumd_62_1_20__1.pdf [file annrheumd_62_1_20__1.pdf]

**Table W1 Descriptive statistics for the NHP sections, BASFI, LDQ and DFI  
(n, median, inter-quartile range(IQR))**

|               | UK  |        |            | Netherlands |        |           |
|---------------|-----|--------|------------|-------------|--------|-----------|
|               | n   | Median | IQR        | n           | Median | IQR       |
| <b>Time 1</b> |     |        |            |             |        |           |
| <b>NHP-PM</b> | 198 | 37.5   | 12.5-62.5  | 149         | 25.0   | 12.5-37.5 |
| <b>NHP-EN</b> | 203 | 66.7   | 33.3-100.0 | 154         | 33.3   | 0.0-66.7  |
| <b>NHP-P</b>  | 199 | 75.0   | 37.5-100.0 | 149         | 37.5   | 12.5-87.5 |
| <b>NHP-EM</b> | 197 | 22.2   | 0.0-55.6   | 148         | 11.1   | 0.0-22.2  |
| <b>NHP-SO</b> | 202 | 0.0    | 0.0-20.0   | 152         | 0.0    | 0.0-0.0   |
| <b>NHP-SL</b> | 202 | 60.0   | 20.0-80.0  | 146         | 20.0   | 0.0-60.0  |
| <b>BASFI</b>  | 204 | 61.2   | 37.8-77.9  | 143         | 44.1   | 16.9-63.4 |
| <b>LDQ</b>    | 179 | 15.0   | 8.0-24.0   |             |        |           |
| <b>DFI</b>    |     |        |            | 131         | 22.0   | 9.0-35.0  |
| <b>Time 2</b> |     |        |            |             |        |           |
| <b>NHP-PM</b> | 152 | 37.5   | 12.5-62.5  | 139         | 25.0   | 12.5-37.5 |
| <b>NHP-EN</b> | 154 | 66.7   | 33.3-100.0 | 136         | 33.3   | 0.0-66.7  |
| <b>NHP-P</b>  | 152 | 75.0   | 25.0-100.0 | 134         | 37.5   | 12.5-87.5 |
| <b>NHP-EM</b> | 150 | 22.2   | 0.0-55.6   | 135         | 0.0    | 0.0-22.2  |

|               | UK  |        |           | Netherlands |        |           |
|---------------|-----|--------|-----------|-------------|--------|-----------|
|               | n   | Median | IQR       | n           | Median | IQR       |
| <b>NHP-SO</b> | 153 | 0.0    | 0.0-20.0  | 139         | 0.0    | 0.0-0.0   |
| <b>NHP-SL</b> | 153 | 60.0   | 20.0-80.0 | 134         | 20.0   | 0.0-60.0  |
| <b>BASFI</b>  | 152 | 63.5   | 37.7-80.3 | 129         | 41.3   | 21.3-67.7 |
| <b>LDQ</b>    | 132 | 14.5   | 7.3-22.8  |             |        |           |
| <b>DFI</b>    |     |        |           | 125         | 24.0   | 11.0-32.0 |

Notes: PM = physical mobility, EN = energy level, P = pain

EM = emotional reactions, SO = social isolation, SL = sleep

Scores can range from 0 to 100 for the NHP sections and the BASFI.

Scores can range from 0 to 48 on the LDQ and from 0 to 40 on the DFI.
